# Supplementary material for: Transcriptome analysis of nitric oxide-responsive genes in upland cotton (Gossypium hirsutum)
Source: PLoS One. 2018 Mar 7;13(3):e0192367. doi: 10.1371/journal.pone.0192367 (PMC5841646; doi:10.1371/journal.pone.0192367)
Supplement: S1 Table — (XLSX) [file pone.0192367.s004.xlsx]

## Sheet: S1 Table
S1 Table. Validation of DGE data by qRT-PCR analyses.
	Primer			DGE(Log2(TPM))			qRT-PCR( 2^(-△△Ct))
Gene ID	Forward	Reserve		Control	100-SNP	250-SNP		Control	100-SNP	250-SNP	Person R	signifcant level (*P= 0.05)
CotAD_58035	CGTTATGCCATCATTTGTCAGG	CCTCCTTTAGGCTGTCAGAACC		5.22013	5.83519	6.64092		1.00345	1.03537	2.19486	0.911959	*
			SD	0.223933	0.0708841	0.120003	SD	0.081623	0.0145482	0.100494
CotAD_60374	AAGAGTGAACCGAAAATCCGAC	GGAAGCCTGAATAGCAATGGA		3.35156	4.16723	4.54731		0.998137	1.30028	4.06901	0.801185	*
			SD	0.170514	0.122423	0.140196	SD	0.0260163	0.0107695	0.00150276
CotAD_63482	ATCCATAAGAACCCAAATCCCT	TTCCCAGCCCTAACCACCA		4.19907	4.12279	5.76645		1.00127	1.0137	2.57878	0.998849	*
			SD	0.23866	0.163148	0.0441409	SD	0.049807	0.140856	0.0152825
CotAD_10147	TTGAGGAAGAAGAGCCAAGC	GCAAAAACTGTGCTCCATGA		2.17496	2.9964	3.53202		1.00152	1.30137	1.98564	0.941809	*
			SD	0.115005	0.123814	0.0894148	SD	0.0558275	0.0168289	0.0664361
CotAD_48927	CAAGGCATCAGATTGCGAGA	TGGTTCCTCCTCTTCAAACAAC		1.82872	2.98319	3.47352		1.00211	1.35137	1.60481	0.990561	*
			SD	0.255361	0.13041	0.10961	SD	0.0649525	0.0152652	0.0154094
CotAD_41214	GCACATGTTGCAGATTTTGG	GGCAAAGAACTTTCCATCCA		1.36062	1.88834	2.45539		1.00314	1.87105	3.12353	0.996508	*
			SD	0.0578962	0.143433	0.0642193	SD	0.0806647	0.122734	0.0845064
CotAD_20242	AACTTGTCCTCAACATCTCCGTC	CGAATCCAAAGCAGCCAGTAT		3.93537	4.8122	5.17551		1.00039	2.03916	2.45446	0.999968	*
			SD	0.0164187	0.0620179	0.0345036	SD	0.0276132	0.047501	0.129464
CotAD_11062	GAATTCATGAAGGGCAAGGA	ACAGCCTCACGAGCATTCTT		-0.71968	0.583141	1.23341		1.00016	2.9179	2.26591	0.781378
			SD	0.136755	0.0727595	0.125832	SD	0.0181106	0.213716	0.132542
CotAD_00131	AAGGGCTGAGAACAACAGGG	TATCGCCTGCAATCAGCCAA		-6.64386	-1.78755	0.186902		1.00025	27.7488	30.4083	0.979501	*
			SD	5.1279e-16	0.0692217	0.078645	SD	0.0223794	1.20798	2.2137
CotAD_14502	CCCTCATGGAATGCAAAACT	AGGCTCTTCTCGACCATGAA		2.47439	3.19116	3.57914		1.00192	2.05733	2.17623	0.966049	*
			SD	0.0975316	0.110114	0.0804705	SD	0.0612951	0.340049	0.12642
CotAD_05577	GAATCCTCGCTGTCGGGTCT	TGCAAACTGGAACTGCTCGG		0.36633	0.513855	1.8076		1.00127	2.0137	2.57878	0.829421	*
			SD	0.0548331	0.0791198	0.106471	SD	0.049807	0.240856	0.0152825
CotAD_06531	TTTCCAAAGCAACCGGGGAT	GGAAGCGCAGGAGCATTGAT		-0.128555	0.777698	1.67255		1.00056	0.754366	3.43281	0.819364	*
			SD	0.152879	0.115547	0.1274	SD	0.0330948	0.0433124	0.101994
CotAD_08111	TTCGGAAGGGATACTCGCCA	TCTTCCAACAGCTCCACGTT		1.42629	1.19389	3.10581		1.00151	1.73656	3.40398	0.915203	*
			SD	0.0613839	0.065072	0.0733045	SD	0.0544238	0.230518	0.118283
CotAD_12236	CAGCTGGAAACTCTGAGCGA	CGCATTGCCACTTCGAATCC		1.82028	2.79371	3.38059		1.00015	1.76302	2.89106	0.968139	*
			SD	0.14627	0.0598018	0.119385	SD	0.0176589	0.0829243	0.139802
CotAD_23661	ACCTTGATGGCAAATTGGGAG	CTGGTTTTTGGCATGGTGGG		1.91271	2.60394	3.28242		1.00225	1.05078	1.86669	0.887459	*
			SD	0.193397	0.0191473	0.112454	SD	0.0665232	0.0704623	0.183833
CotAD_24236	GGTCTTTCATCCCGCACAG	TAGCGAGCAAGTCCCCAAG		2.83768	3.45645	3.98748		1.00166	2.02924	2.234	0.947999	*
			SD	0.0808927	0.126134	0.14158	SD	0.0581499	0.138849	0.0707326
CotAD_26567	GTAGCCCTTGGTCCGAGTTG	GAGGTAAGCCTTCTGGTAAACG		3.77951	3.61165	4.85926		0.981327	1.39014	1.92116	0.840307	*
			SD	0.106893	0.158712	0.121091	SD	0.0503315	0.0203744	0.099866
CotAD_29356	TCCATGCCAGCACACTTGAT	AATCCTGAGCTTTACGCCCG		4.68963	6.08024	5.87339		1.12504	2.59784	2.7577	0.974299	*
			SD	0.062646	0.0997453	0.112152	SD	0.00510921	0.0836746	0.0895721
CotAD_29832	CGAAGTCAAACCAGTATCCGAA	AGTTACCTTGCCCCAAATGC		5.09751	5.23856	6.16631		1.03967	0.502616	1.71143	0.835859	*
			SD	0.0720374	0.0968354	0.0340239	SD	0.116141	0.0626401	0.0980084
CotAD_35694	GCCAAACATGCCTCTAGGGT	TCGCCACTAAATGCGGTGAA		0.413618	-1.21994	1.83592		0.999369	0.552686	1.3463	0.99947	*
			SD	0.232584	0.0823334	0.107188	SD	0.01562	0.0544418	0.0146824
CotAD_42959	ACGGATTCATTCAGGGCTCC	ATCACTTGCTGCTGCTTCCT		-0.133656	0.78133	1.49518		0.944975	1.18617	1.66753	0.966193	*
			SD	0.199742	0.0556433	0.038493	SD	0.0570369	0.0811108	0.0330699
CotAD_44201	AGCATCCTGCAAAGGTCTCC	TTTGACAGCACCCGTAGCAT		2.58398	2.88017	3.80951		1.05052	0.836605	1.20242	0.65631
			SD	0.0534994	0.0655749	0.0518195	SD	0.0133636	0.0936198	0.0809991
CotAD_45658	GCTTGAGCGTGGAGTTAGGT	GATACAGGGCAGCATTTGCG		3.55378	4.7132	4.4453		1.01184	2.40573	2.23188	0.994194	*
			SD	0.0483588	0.0675495	0.0685323	SD	0.084519	0.0817083	0.0243622
CotAD_70087	CGTTGACCAAAACAGAGCACTT	TGTCTTCTTCTTTGGAACACGG		3.63848	4.9453	5.15995		0.999	2.21948	2.86809	0.97632	*
			SD	0.110721	0.0525162	0.106416	SD	0.0752379	0.0719466	0.117802
CotAD_74138	CATCACCTCAATGCCTTCCTAC	ATCAGTCCCCAAAGATAACCCT		-6.64386	-1.4743	1.13878		1.09107	8.07189	15.2865	0.980671	*
			SD	5.1279e-16	0.0327305	0.122835	SD	0.0030384	0.0445002	0.0927697
