# Supplementary material for: Transcriptome analysis of nitric oxide-responsive genes in upland cotton (Gossypium hirsutum)
Source: PLoS One. 2018 Mar 7;13(3):e0192367. doi: 10.1371/journal.pone.0192367 (PMC5841646; doi:10.1371/journal.pone.0192367)
Supplement: S3 Table — (XLSX) [file pone.0192367.s006.xlsx]

## Sheet: S3 Table
S3 Table. Distribution of total and distinct clean tags of the DGE libraries.
Control1
Tag Copy Number	Total Tag (Percentage)	Distinct Tag (Percentage)
[2,5]	432040 (3.21%)	150390 (53.56%)
[6,10]	316630 (2.35%)	41652 (14.83%)
[11,20]	430049 (3.19%)	29357 (10.46%)
[21,50]	854015 (6.34%)	26501 (9.44%)
[51,100]	969981 (7.19%)	13614 (4.84%)
>100	10471537 (77.72%)	19277 (6.87%)
Control2
Tag Copy Number	Total Tag (Percentage)	Distinct Tag (Percentage)
CopyNum >=2	446555 (2.73%)	155640 (53.52%)
CopyNum >5	324646 (1.99%)	42638 (14.66%)
CopyNum >10	442579 (2.71%)	30284 (10.41%)
CopyNum >20	875927 (5.36%)	27226 (9.37%)
CopyNum >50	976082 (5.98%)	13739 (4.72%)
CopyNum >100	13271263 (81.23%)	21286 (7.32%)
Control3
Tag Copy Number	Total Tag (Percentage)	Distinct Tag (Percentage)
CopyNum >=2	439994 (2.91%)	153121 (53.48%)
CopyNum >5	320051 (2.11%)	42086 (14.7%)
CopyNum >10	434268 (2.86999999999999%)	29666 (10.36%)
CopyNum >20	865337 (5.72%)	26894 (9.39%)
CopyNum >50	977160 (6.46%)	13742 (4.8%)
CopyNum >100	12092555 (79.93%)	20802 (7.27%)
100-SNP1
Tag Copy Number	Total Tag (Percentage)	Distinct Tag (Percentage)
CopyNum >=2	426652 (3.05%)	148810 (53.46%)
CopyNum >5	307418 (2.2%)	40373 (14.5%)
CopyNum >10	432781 (3.1%)	29566 (10.62%)
CopyNum >20	850768 (6.08%)	26442 (9.5%)
CopyNum >50	974268 (6.97%)	13639 (4.9%)
CopyNum >100	10986387 (78.6%)	19533 (7.02%)
100-SNP2
Tag Copy Number	Total Tag (Percentage)	Distinct Tag (Percentage)
CopyNum >=2	412978 (2.83%)	144352 (54.11%)
CopyNum >5	295500 (2.02%)	38879 (14.57%)
CopyNum >10	405733 (2.77000000000001%)	27686 (10.38%)
CopyNum >20	788242 (5.39999999999999%)	24509 (9.18%)
CopyNum >50	872394 (5.97%)	12267 (4.6%)
CopyNum >100	11838531 (81.01%)	19096 (7.16%)
100-SNP3
Tag Copy Number	Total Tag (Percentage)	Distinct Tag (Percentage)
CopyNum >=2	413694 (3.01%)	144281 (53.72%)
CopyNum >5	298022 (2.16%)	39214 (14.6%)
CopyNum >10	409970 (2.98%)	28027 (10.43%)
CopyNum >20	814708 (5.92%)	25244 (9.4%)
CopyNum >50	914909 (6.65%)	12814 (4.77%)
CopyNum >100	10908614 (79.28%)	19020 (7.08%)
250-SNP1
Tag Copy Number	Total Tag (Percentage)	Distinct Tag (Percentage)
CopyNum >=2	433858 (3.31%)	150382 (53.54%)
CopyNum >5	315706 (2.41%)	41539 (14.79%)
CopyNum >10	435172 (3.32%)	29722 (10.58%)
CopyNum >20	856038 (6.51999999999999%)	26532 (9.44%)
CopyNum >50	971937 (7.42%)	13628 (4.86%)
CopyNum >100	10099018 (77.02%)	19081 (6.79%)
250-SNP2
Tag Copy Number	Total Tag (Percentage)	Distinct Tag (Percentage)
CopyNum >=2	426049 (3.12%)	148105 (53.91%)
CopyNum >5	307651 (2.25%)	40565 (14.76%)
CopyNum >10	418275 (3.07000000000001%)	28479 (10.37%)
CopyNum >20	819617 (5.99999999999999%)	25463 (9.27%)
CopyNum >50	927877 (6.80000000000001%)	13040 (4.74%)
CopyNum >100	10753361 (78.76%)	19083 (6.95%)
250-SNP3
Tag Copy Number	Total Tag (Percentage)	Distinct Tag (Percentage)
CopyNum >=2	457198 (3.25%)	159025 (53.97%)
CopyNum >5	329410 (2.34%)	43347 (14.71%)
CopyNum >10	447054 (3.17000000000001%)	30573 (10.37%)
CopyNum >20	878054 (6.24%)	27340 (9.28%)
CopyNum >50	995614 (7.07%)	13988 (4.75%)
CopyNum >100	10973695 (77.93%)	20406 (6.92%)
